# Supplementary material
Source: Springer Nature journal article supplement (https://www.springermedizin.de/resource/supplementary/12985_2010_1023_MOESM12_ESM.pdf/9608968)

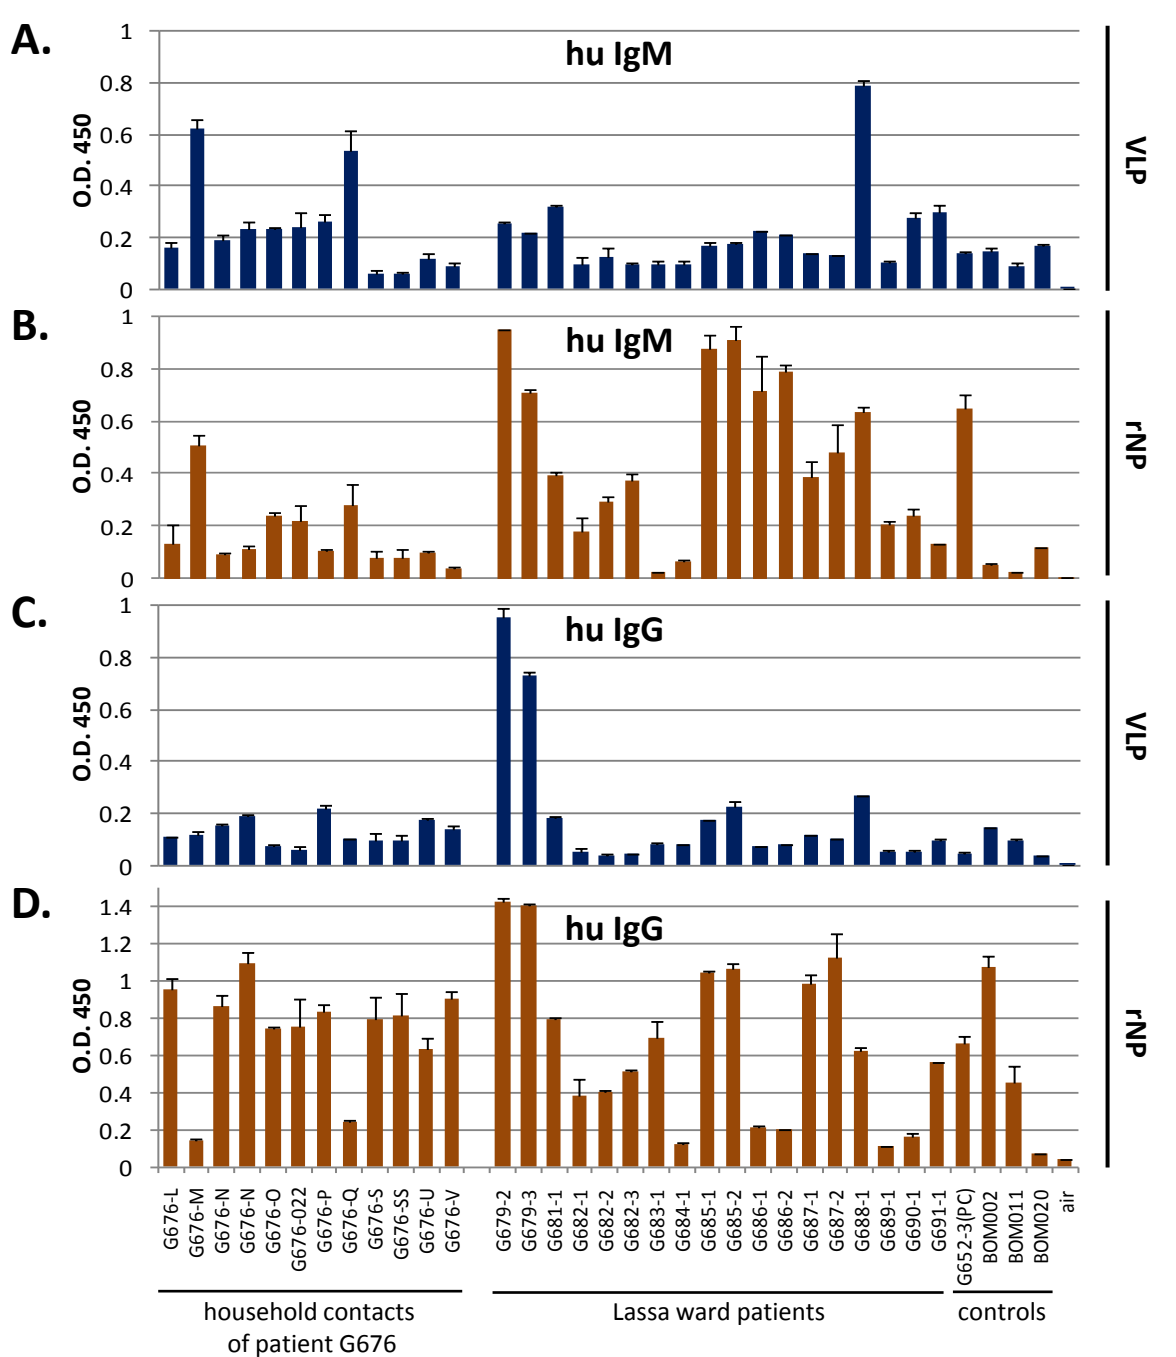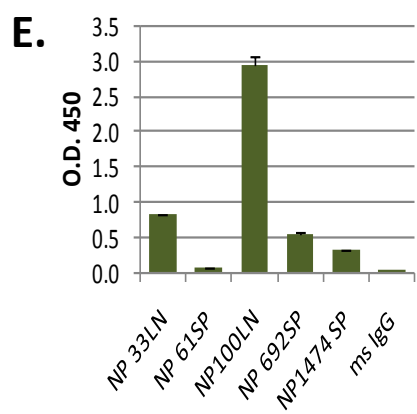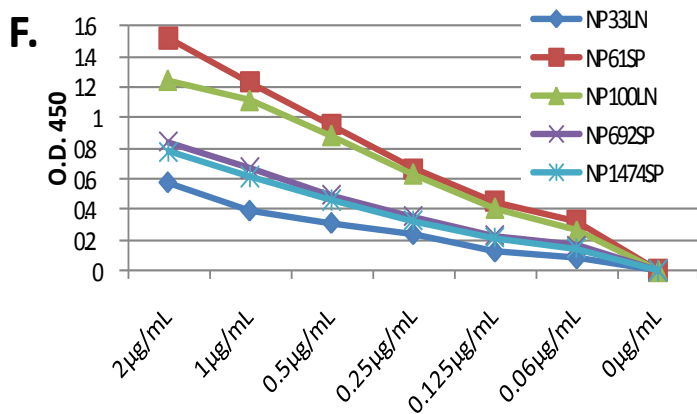

Supplement: MOESM12 [file 9608968]
